# Supplementary material for: Who is Represented in the Research on Undergraduate Research Experiences in the Natural Sciences? A Review of Literature
Source: Atypon-hosted journal article supplement (doi:10.1187/cbe.23-07-0137), 2024-05-28
Supplement: combinedsupmats.pdf [file combinedsupmats.pdf]

# Supplemental Material

*CBE—Life Sciences Education*

Goodwin *et al.*

## SUPPLEMENTAL INFORMATION

### **Who is represented in the research on undergraduate research experiences in the natural sciences? A review of literature.**

Emma C. Goodwin<sup>1</sup>, Logan E. Gin<sup>1</sup>, Allyson Aeschliman<sup>2</sup>, Adwoa Kumi Afoakwa<sup>2</sup>, Bryttani A. Allred<sup>2</sup>, Sarah T. Avalor<sup>2</sup>, Amanda Bell<sup>2</sup>, Jessica Berkheimer<sup>2</sup>, Hannah Brzezinski<sup>2</sup>, Rachel Campos<sup>2</sup>, Hozhoo Emerson<sup>2</sup>, Savage Cree Hess<sup>2</sup>, Arron M. Montelongo<sup>2</sup>, Nereus Noshirwani<sup>2</sup>, W. Levi Shelton<sup>2</sup>, Emma M. Valdez<sup>2</sup>, Jennifer White<sup>2</sup>, Quinn White<sup>2</sup>, Ehren Wittekind<sup>2</sup>, Katelyn M. Cooper<sup>1</sup>, Sara E. Brownell<sup>1^</sup>

1 Research for Inclusive STEM Education Center, School of Life Sciences, Arizona State University

2 The NSF LEAP Scholars, Research for Inclusive STEM Education Center, Arizona State University

<sup>^</sup>Corresponding author. Email: Sara.Brownell@asu.edu

## Table of Contents

|                                                                                               |    |
|-----------------------------------------------------------------------------------------------|----|
| S1. Copy of article coding rubric, provided to student coders.....                            | 3  |
| S2. Complete list of search terms used .....                                                  | 8  |
| S3. Copy of Google coding form .....                                                          | 9  |
| S4. Research Article Library.....                                                             | 22 |
| S5. Studies by discipline and research type .....                                             | 32 |
| S6. Specific demographics reported and considered in analysis across all research papers..... | 33 |
| S7. Specific demographics reported and considered in analyses by URE type .....               | 35 |
| S8. Analyses of demographic variable use by study research type .....                         | 37 |
| S9. Specific demographics reported and considered in analyses by methodological type .....    | 38 |
| S10. Analyses of demographic variable use by study method type.....                           | 40 |
| S11. Full linear and logistic regression results .....                                        | 41 |

## S1. Copy of article coding rubric, provided to student coders

### Guide for finding information: Where this information is often included

- Introduction- This section will provide background information on the study. While this may not be directly related to the information for our research question, some of the necessary information for completing the form could be found in this section (e.g., details on the type of research experience, where the study was conducted, etc.)
- Methods- This section will allow us to determine how the data was collected for the particular study and the type of study being conducted (e.g., qualitative, quantitative). This section may also show us which types of information were collected from students and could provide examples of the survey/interview questions that were asked/students responded to which would be helpful in collecting the information in the form.
- Results- This section will allow us to determine whether the demographic information that the study included (if it includes it) has been included in the analysis. For quantitative research studies, this often comes in the form of statistical analyses, such as regression, ANOVA, t-tests, etc. For qualitative research studies, you will specifically be looking for if any of the research findings, quotes, student responses were broken down or analyzed.
- Supplemental information/files/materials- This is a supplemental document that provides additional information for readers to help with their interpretation of the study. Authors often choose to put data and information in the supplemental material that is not directly relevant to the research question/study but can assist with specifics of how the research was conducted, additional data that was collected, and how one may go about repeating a particular study.

### Helpful tips:

- Starting with a ctrl+f search for the term you are interested in can be a good start to save time. However, it is important to note that even if the search does not come back with results from an initial search, this does not mean the paper is lacking information. You must then go to the paper to ensure that this information is not included elsewhere or with language other than the term you are using.

### Article parameters:

- Types of studies: all *empirical* studies on student participation in undergraduate research **(must include student data)**
  - Examples include: survey, focus groups, interviews, questionnaires, reflections, registrar data, etc.
  - Does not include a dissertation, book, essay, or editorial about undergraduate research that is just opinions and does not have data
  - Does not include non-peer reviewed research (e.g., research presented at a conference)

- Context of research project (not major): natural sciences (biology, chemistry, physics, geosciences, STEM)
  - Not psychology, not education, no engineering
- Database: Google Scholar
- Timeline: studies from 2014-2020 ([set this in Google Scholar](#)); date that the article was initially published (not published online); refer to Google Scholar for this information
- Types of research experiences: Undergraduate research experiences (UREs), Apprenticeships, Course-based undergraduate research experiences (CUREs), Course-based research experiences (CREs) (see below)

### **Quality control checklist:**

1. Check contents of article against quality control parameters to determine if it meets criteria
  - a. “Keep” - article remains in library
  - b. “Delete” - article should be deleted
  - c. If there is an instance of disagreement, the instructor will provide final review/decision
2. Verify that the citation listed is the APA citation from Google Scholar (paste in from Google Scholar) and that the link is correct to the article
3. Check to see if article is repeated in the library; delete any repeats
4. If an article requires ILL access, verify that the article is in shared folder (save/edit naming of file to be [Author last name et al.] (Year)
5. Return to meet as a group to discuss any inconsistencies and/or delete articles from library

### **Article tracking information:**

- Coder initials
- Group members- names of your three coding members
- Article number- from article library Google sheet
- APA citation of article (using Google Scholar)
- Journal (full name of journal, not abbreviated)
- Year published (add option for outside of year, 2013)

### **Study characteristics:**

- *Type of experience*
  - Course-based undergraduate research experience (CUREs)- this can also include course-based research experiences (CREs), research-focused lab courses; research embedded into a course that students take (e.g., assignments, quizzes, class meetings, etc.)
  - Undergraduate research experience (UREs)- other synonyms can include research apprenticeship/internship/mentorship, traditional research experiences, research experiences for undergraduates (REUs), summer research experiences, required research

experiences as part of curriculum (likely not part of a course; if it were part of a summer course, it would be a CURE)

- Both CURE/URE- study includes data from students who participated in both CURE/URE (e.g., comparison study between CURE students and URE students)
- Other (please list) - If study specifically references that it is not a CURE/URE but involves undergraduate research (will be re-reviewed to see if this meets our article library parameters)
- *Number of research participants*
  - Total number of research participants who actually were surveyed, interviewed, or participated in class/program, etc. (“response rate” = number/percent of student who actually completed survey/study (often quantitative); not total number that were sent a survey)
  - We are not interested in the total number of students in course/research unless they tell us about demographics of these students
  - Range values: 1-20, 21-50, 51-100, 101-200, 201-500, 500+
  - May have a post-hoc group review for sample size discrepancies (afterwards)
- *Discipline of the research experience (chose the most closely related discipline of the research experience)*
  - Biology (also life sciences, microbiology, genetics, physiology, ecology, evolution, biomedical, environmental science, etc.)
  - Health sciences (includes premed, nursing, etc.)- code this as “biology” if it is not specific to health/health-related majors
  - Biochemistry
  - Chemistry
  - Physics
  - Geology (also includes geosciences)
  - STEM
    - NOTE: STEM is ok, but if it is purely engineering or mathematics focused, should not be included in study.
    - If study includes research areas in one of the disciplines we are excluding (e.g., engineering, math, humanities), it would be coded here
    - If the study includes research areas that are “STEM”, we would include it (even if some students may be outside of natural science disciplines)
  - STEM + non-STEM (ex: collect data on STEM students but could include social sciences; other students could be included in dataset)
  - Does not specify
- *Methods*
  - Qualitative- majority of student data through interviews, focus groups, reflections, etc. (“words”); source of information is often through verbal/written form
  - Quantitative- majority of student data through the use of surveys, scales, instruments, etc. (“number”);
    - Often includes specific statistical analyses (e.g., regression, ANOVA, p-values, etc.)

- *Did this study take place at an international institution?*
  - If the data were collected from students at an institution outside of the United States (e.g., Australia’s ALURE program), select ‘yes.’
- *Does this study meet our parameters?*
  - This is a final check to ensure that the study does, in fact, meet our parameters
    - 2014-2020, empirical data, URE/CURE, undergraduate populations (not exclusive high school or graduate school)

### **Demographics - Reported with numbers**

Which of the following demographics are *reported* from students? (Check all that apply)

- Systematically collected from students- from university registrar, survey
- Does not need to specify method of data collection if it is reported
- Sample sizes, %, number of students, specifics (e.g., 40% women, 13 first-generation students, mean age of 21, average GPA of 3.5)
- Demographic data could be reported in-text and not necessarily in a table format
- If no demographics are reported from students, select the box “No demographics are reported from students”

### **Demographics - Analysis**

Which of the following demographics are *included* in the analyses? (Check all that apply)

- These are statistical, qualitative, and quantitative **comparisons** between or within certain groups of students belonging to certain demographic groups (e.g., women score higher than men, first-gen students report this, etc.)
- Note: The finding or summary of the comparison could be reported in the results/discussion but the more specific information (e.g., stats, models, regressions, etc.) could be presented in the supplemental material
- If population/sample of students are homing in on one specific identity (e.g., only students with disabilities) and results are considering the unique experiences of these students, it would be coded as “included” here
- If no demographics are included in analyses, select the box “No demographics are included in analysis”

### **Demographics - Location**

- Where are the demographics of the study? (select all that apply)
  - In article (e.g., figures, tables, text)
  - Supplemental material
  - No student demographics were presented in this study

Demographics can include:

- Gender identity- (e.g., gender- man/woman, sex- male, female)
- Race/ethnicity- includes information on race, ethnicity, origin, racial background, underrepresented racial minority (URM)
- College generation status- includes information on college generation status, parental education level

- Major- includes information on the major of students in the study
- Grade-point-average (GPA)
- Year in school- includes if it is taken of each student (e.g., freshman, sophomore, junior, senior); this could also include number of credits earned
- Age of participants
- Socioeconomic status- could also include household income levels, Pell grant status
- Disability/ability status- if study includes only anxiety/depression, code as “mental health status”
- Mental health status- e.g., anxiety, depression
- LGBTQ+ status
- Caregiving status
- International student status
- Commuter status- also includes home/situation (e.g., live on campus, commute, etc.) or distance from home institution
- Residency status- in-state/out-of-state student status
- Military status
- Religion
- Community college transfer status
- Career goals or career interest (if it is an outcome, e.g., where students go after URE, this would be an outcome, not a demographic)
- Employment status
- Honor’s students
- Standardized testing scores (e.g., SAT, ACT, AP scores)
- Prior research experience- previous research experience
- Type of institution student comes from- community college, Master’s, Research-intensive, predominantly undergraduate (includes transfer student status)
- Language spoken (e.g., native language)
- Enrollment status- full-time, part-time, online, etc.
- Other (please specify)

**Reminder about outcomes:**

- Many studies will often consider the effects, impacts, outcomes, etc. of student experiences from participating in UREs/CUREs. It is important to note that we are not interested in collecting information on the outcomes that studies report on from students. These are not considered demographics (thus, are not related to our research questions).
- Common outcome measures that you may encounter could include:
  - Graduation/retention rates
  - Persistence in research, science, STEM (e.g., Persistence in the Sciences (PITS) Survey)
  - Assessments/surveys (e.g., Laboratory Course Assessment Survey (LCAS))
  - Concept inventories
  - Grades/performance data



## S2. Complete list of search terms used

The terms in the “Research and Discipline Search Terms” column were first used individually to search for articles about CUREs and UREs. Additional searches were done systematically combining the “Research and Discipline” search terms with the “Demographic Search Terms.”

| Research and Discipline Search Terms                                                                                                                                                                                                                                                                                                                                                                                                                                                                                                                                                                                                                                                                                                                                                                                                                                                                                                  | Demographic Search Terms                                                                                                                                                                                                                                                                                                                                                                                                                                                                                                                                                                                                                                                                                                              |
|---------------------------------------------------------------------------------------------------------------------------------------------------------------------------------------------------------------------------------------------------------------------------------------------------------------------------------------------------------------------------------------------------------------------------------------------------------------------------------------------------------------------------------------------------------------------------------------------------------------------------------------------------------------------------------------------------------------------------------------------------------------------------------------------------------------------------------------------------------------------------------------------------------------------------------------|---------------------------------------------------------------------------------------------------------------------------------------------------------------------------------------------------------------------------------------------------------------------------------------------------------------------------------------------------------------------------------------------------------------------------------------------------------------------------------------------------------------------------------------------------------------------------------------------------------------------------------------------------------------------------------------------------------------------------------------|
| <ul style="list-style-type: none"> <li>• Undergraduate research</li> <li>• Undergraduate research experience</li> <li>• UREs</li> <li>• Course-based undergraduate research experience</li> <li>• Course-based research experience</li> <li>• CURE</li> <li>• CRE</li> <li>• Apprenticeships</li> <li>• Independent research</li> <li>• Research apprenticeships</li> <li>• Undergraduate research + biology</li> <li>• Undergraduate research experience and Underrepresented minority</li> <li>• UREs + biology</li> <li>• Undergraduate research + chemistry</li> <li>• Undergraduate research experience + chemistry</li> <li>• UREs + chemistry</li> <li>• Undergraduate research + physics</li> <li>• Undergraduate research experience + physics</li> <li>• UREs + physics</li> <li>• Undergraduate research + geosciences</li> <li>• Undergraduate research experience + geosciences</li> <li>• UREs + geosciences</li> </ul> | <ul style="list-style-type: none"> <li>• Demographics</li> <li>• Representation</li> <li>• Student identity</li> <li>• Social identity</li> <li>• Underrepresented minority</li> <li>• URM</li> <li>• Underserved students</li> <li>• GPA</li> <li>• Academic ability</li> <li>• Underperforming</li> <li>• Gender</li> <li>• Sex</li> <li>• Female</li> <li>• Woman</li> <li>• Race/ethnicity</li> <li>• Race</li> <li>• Ethnicity</li> <li>• Black</li> <li>• African American</li> <li>• Hispanic</li> <li>• Latinx</li> <li>• Asian</li> <li>• Low-income</li> <li>• Pell eligible</li> <li>• Transfer</li> <li>• Veteran</li> <li>• First generation</li> <li>• First-generation</li> <li>• Caregiver</li> <li>• LGBT</li> </ul> |

### S3. Copy of Google coding form

## Literature Review Coding Form

Please be sure to have the coding dictionary open and available for reference while you complete the coding form. The coding dictionary can be found here:

<https://docs.google.com/document/d/1deZQoW2CR4AvyzMoASWb-UDggL-aSRQgwZbv5LEI3Ko/edit>.

Coder Initials (e.g. LEG)

Your answer \_\_\_\_\_

Which group are you in? (List the three group members)

Your answer \_\_\_\_\_

Article # (from article library Google sheet)

Your answer \_\_\_\_\_

APA Citation (using Google Scholar's reference)

Your answer \_\_\_\_\_

# Literature Review Coding Form

## Study Characteristics

What type of research experience(s) does the article cover? (If "Other" is selected, leave a note for why you selected this because we will re-review to ensure it meets parameters)

- Undergraduate research experiences (UREs)
- Course-based undergraduate research experiences (CUREs)
- Both UREs and CUREs
- Other: \_\_\_\_\_

How many participants were included in the study? (Select a "flag for review" if you encountered any issues)

- 1-20
- 21-50
- 51-100
- 101-200
- 201-500
- >500
- Not specified
- Flag for review- unclear, combining samples, etc.

What was the discipline of the research experience? Choose the most closely related discipline.

- Biology (includes life sciences, microbiology, genetics, physiology, ecology, evolution, environmental science, biomedical, etc.)
- Health sciences (e.g. nursing, premed, etc.)
- Biochemistry
- Chemistry
- Physics
- Geology (includes geosciences)
- STEM
- STEM + non-STEM
- Does not specify

What methods did the paper use? (Choose all that apply)

- Quantitative (e.g. survey, instruments, scales)
- Qualitative (e.g. interview, focus groups, open-ended questions)

Did this study take place at an international institution?

Yes

No

Does the study meet our parameters to be included in our analysis? (If you are unsure, select "Other" and leave a note in the feedback box for re-review)

Yes

No

Other: \_\_\_\_\_

[Back](#)

[Next](#)

# Literature Review Coding Form

## Student Demographics - Reported with numbers

These data are systematically collected from students through the university registrar, survey, questionnaire, etc. It does not necessarily need to specify the method of data collection, as long as the data are reported. Data to look for would be total number of students within a particular group, sample sizes (n), percentages of students, averages, etc. (e.g. 40% women, 13 first-generation students, mean age of 21, average GPA of 3.5). See the coding dictionary for additional details.

Which of the following demographics are reported from students? (Check all that apply. If none are reported, select "No demographics are reported")

- Gender identity
- Race/ethnicity
- College generation status
- Major
- Grade-point-average (GPA)
- Year in school (e.g. freshman, sophomore, junior, senior if collected from each student)
- Age of participants
- Socioeconomic status (e.g.household income levels, Pell grant status)
- Disability/ability status
- Mental health status (e.g. anxiety, depression)

- LGBTQ+ status
- Caregiving status
- International student status
- Commuter status (e.g. live on campus, commute, etc.)
- Residency status (e.g. in-state/out-of-state student status)
- Military status
- Religion
- Career goals or career interest
- Employment status
- Honor's students
- Standardized testing scores (e.g. SAT, ACT, AP scores)
- Prior research experience (e.g. previous research experience)
- Type of institution student comes from
- Language spoken (e.g. native language)
- Number of credits earned
- No demographics are reported from students
- Other: \_\_\_\_\_

[Back](#)

[Next](#)

# Literature Review Coding Form

## Student Demographics - Analyzed

These are statistical, qualitative, and quantitative comparisons between or within certain groups of students belonging to certain demographic groups (e.g. women score higher than men, first-generation students report this, etc.). The finding or summary of the comparison could be reported in the results/discussion but the more specific information (e.g. stats, models, regressions, etc.) could be presented in the supplemental material

If population/sample of students are honing in on one specific identity (e.g. only deaf students) and results are considering the unique experiences of these students, it would be coded as "included" here. See the coding dictionary for additional details.

Which of the following demographics are included in analyses of students?  
(Check all that apply. If none are reported, select "No demographics are reported")

- Gender identity
- Race/ethnicity
- College generation status
- Major
- Grade-point-average (GPA)
- Year in school (e.g. freshman, sophomore, junior, senior if collected from each student)
- Age of participants
- Socioeconomic status (e.g. household income levels, Pell grant status)
- Disability/ability status



- Mental health status (e.g. anxiety, depression)
- LGBTQ+ status
- Caregiving status
- International student status
- Commuter status (e.g. live on campus, commute, etc.)
- Residency status (e.g. in-state/out-of-state student status)
- Military status
- Religion
- Career goals or career interest
- Employment status
- Honor's students
- Standardized testing scores (e.g. SAT, ACT, AP scores)
- Prior research experience (e.g. previous research experience)
- Type of institution student comes from
- Language spoken (e.g. native language)
- Number of credits earned
- No demographics are included in analyses of students
- Other: \_\_\_\_\_

[Back](#)

[Next](#)

# Literature Review Coding Form

## Student Demographics - Mentioned without numbers

These demographics are not systematically but are mentioned in the article in passing or in the methods (but do not report on overall percentages of what is reported). The data does not appear to be systematically collected from a survey, university registrar, etc. An article could generally mention who students are (e.g. "mix of men and women"), but has the absence of numbers, percentages, etc. that would be evident of systematic data collection. If there is more specificity, it would be counted in the next section as "reported" (e.g. mention in text, but report percentages in table). If the study program/course/institution is focused on a particular demographic or broadly about the students who may participate (e.g. LEAP for transfer students) but does not specifically report # of students, etc. it would be coded here. See the coding dictionary for additional details.

Which of the following demographics are mentioned about students? (Check all that apply. If none are mentioned, select "No demographics mentioned")

- Gender identity
- Race/ethnicity
- College generation status
- Major
- Grade-point-average (GPA)
- Year in school (e.g. freshman, sophomore, junior, senior if collected from each student)
- Age of participants
- Socioeconomic status (e.g. household income levels, Pell grant status)
- Disability/ability status

- Mental health status (e.g. anxiety, depression)
- LGBTQ+ status
- Caregiving status
- International student status
- Commuter status (e.g. live on campus, commute, etc.)
- Residency status (e.g. in-state/out-of-state student status)
- Military status
- Religion
- Career goals or career interest
- Employment status
- Honor's students
- Standardized testing scores (e.g. SAT, ACT, AP scores)
- Prior research experience (e.g. previous research experience)
- Type of institution student comes from
- Language spoken (e.g. native language)
- Number of credits earned
- No demographics are mentioned about students
- Other: \_\_\_\_\_

[Back](#)

[Next](#)

# Literature Review Coding Form

## Student Demographics - Location

Where are the demographics located in the paper? Select all that apply.

- Within article (e.g. methods, text, figures, tables)
- Supplemental material
- No demographics were presented in this study

[Back](#)

[Next](#)

Type of institution (Check all that apply)

- Multi-institutional
- Doctoral/Research-intensive/Research institution
- Masters granting/Comprehensive institution
- Primarily undergraduate institution/small liberal arts college/undergraduate institution
- Community college/ junior college/2-yr institution
- Public
- Private
- Does not specify
- Other...

Is it a historically black college or university (HBCU)?

- Yes
- No
- Does not specify

Is it a Hispanic-serving institution?

- Yes
- No
- Does not specify

Is it an international institution?

- Yes
- No
- Does not specify

What is the geographic region of the institution(s)? (If it is international, put the country in the "Other" option)

- North
- South
- East
- West
- Northeast
- Southeast
- Southwest
- Northwest
- Does not specify
- Other...

## Literature Review Coding Form

### Feedback

Did you have any questions, concerns, or issues with this paper? Additionally, if you are unsure whether the article meets our parameters (2014-2020, empirical data, URE/CURE, etc.), please note that here:

Your answer \_\_\_\_\_

[Back](#)

[Submit](#)

## S4. Research Article Library

---

- 1 Adedokun, O. A., Parker, L. C., Childress, A., Burgess, W., Adams, R., Agnew, C. R., ... & Teegarden, D. (2014). Effect of time on perceived gains from an undergraduate research program. *CBE-Life Sciences Education*, 13(1), 139-148.
  - 2 Aikens, M. L., Robertson, M. M., Sadselia, S., Watkins, K., Evans, M., Runyon, C. R., ... & Dolan, E. L. (2017). Race and gender differences in undergraduate research mentoring structures and research outcomes. *CBE-Life Sciences Education*, 16(2), ar34.
  - 3 Aikens, M. L., Sadselia, S., Watkins, K., Evans, M., Eby, L. T., & Dolan, E. L. (2016). A social capital perspective on the mentoring of undergraduate life science researchers: An empirical study of undergraduate, postgraduate, faculty triads. *CBE-Life Sciences Education*, 15(2), ar16.
  - 4 Andriole, D. A., Jeffe, D. B., & Tai, R. H. (2015). Participation in college laboratory research apprenticeships among students considering careers in medicine. *Medical education online*, 20(1), 27231.
  - 5 Anthony, A. K., Walters, L., & McGrady, P. (2017). Creating connections between authentic research and the development of science identities in undergraduate Marine Biology experiences. *Florida Scientist*, 80(2/3), 61-76.
  - 6 Ballen, C. J., Thompson, S. K., Blum, J. E., Newstrom, N. P., & Cotner, S. (2018). Discovery and broad relevance may be insignificant components of CUREs for non-biology majors. *Journal of microbiology & biology education*, 19(2).
  - 7 Brown, P., Baron, S. I., Cumming, T., & Mengeling, M. (2020). The Impact of Undergraduate Research and Student Characteristics on Student Success Metrics at an Urban, Minority Serving, Commuter, Public Institution.
  - 8 Bhatt, R., West, B., & Chaudhary, S. (2020). Biomedical career enrichment programs: Exploring women and minority participants motivators and outcomes. *Plos one*, 15(2), e0228934.
  - 9 Bhattacharyya, P., Chan, C. W., & Waraczynski, M. (2018). How Novice Researchers See Themselves Grow. *International Journal for the Scholarship of Teaching and Learning*, 12(2), 3.
  - 10 Bickford, N., Peterson, E., Jensen, P., & Thomas, D. (2020). Undergraduates Interested in STEM Research Are Better Students than Their Peers. *Education Sciences*, 10(6), 150.
  - 11 Brownell, S. E., Hekmat-Safe, D. S., Singla, V., Chandler Seawell, P., Conklin Imam, J. F., Eddy, S. L., ... & Cyert, M. S. (2015). A high-enrollment course-based undergraduate research experience improves student conceptions of scientific thinking and ability to interpret data. *CBE-Life Sciences Education*, 14(2), ar21.
  - 12 Burton, G. S., & Vicente, M. D. G. H. (2018). A Narrative Analysis Examining Influential Factors of a Minority Research and Training Program. *Journal of College Student Retention: Research, Theory & Practice*, 1521025118813605.
  - 13 Byars-Winston, A. M., Branchaw, J., Pfund, C., Leverett, P., & Newton, J. (2015). Culturally diverse undergraduate researchers academic outcomes and perceptions of their research mentoring relationships. *International Journal of Science Education*, 37(15), 2533-2554.
  - 14 Byars-Winston, A., Leverett, P., Benbow, R. J., Pfund, C., Thayer-Hart, N., & Branchaw, J. (2020). Race and ethnicity in biology research mentoring relationships. *Journal of Diversity in Higher Education*, 13(3), 240.
  - 15 Byars-Winston, A., Rogers, J., Branchaw, J., Pribbenow, C., Hanke, R., & Pfund, C. (2016). New measures assessing predictors of academic persistence for historically underrepresented racial/ethnic undergraduates in science. *CBE-Life Sciences Education*, 15(3), ar32.
-

- 
- 16 Carpi, A., Ronan, D. M., Falconer, H. M., & Lents, N. H. (2017). Cultivating minority scientists: Undergraduate research increases self, efficacy and career ambitions for underrepresented students in STEM. *Journal of Research in Science Teaching*, 54(2), 169-194.
  - 17 Ceyhan, G. D., & Tillotson, J. W. (2020). Mentoring Structures and the Types of Support Provided to Early-Year Undergraduate Researchers. *CBE-Life Sciences Education*, 19(3), ar26.
  - 18 Chase, A. M., Clancy, H. A., Lachance, R. P., Mathison, B. M., Chiu, M. M., & Weaver, G. C. (2017). Improving critical thinking via authenticity: the CASPiE research experience in a military academy chemistry course. *Chemistry Education Research and Practice*, 18(1), 55-63.
  - 19 Chou, A. F., Hammon, D., & Akins, D. R. (2019). Impact and Outcomes of the Oklahoma IDeA Network of Biomedical Research Excellence Summer Undergraduate Research Program. *Journal of Microbiology & Biology Education*, 20(3).
  - 20 Collins, T. W., Grineski, S. E., Shenberger, J., Morales, X., Morera, O. F., & Echegoyen, L. E. (2017). Undergraduate research participation is associated with improved student outcomes at a Hispanic-serving institution. *Journal of college student development*, 58(4), 583.
  - 21 Cooper, J., Jabanoski, K., & Kaplan, M. (2019). Exploring experiential opportunity impacts on undergraduate outcomes in the geosciences. *Journal of Geoscience Education*, 67(3), 249-265.
  - 22 Cooper, K. M., Blattman, J. N., Hendrix, T., & Brownell, S. E. (2019). The impact of broadly relevant novel discoveries on student project ownership in a traditional lab course turned CURE. *CBE-Life Sciences Education*, 18(4), ar57.
  - 23 Cooper, K. M., Gin, L. E., & Brownell, S. E. (2020). Depression as a concealable stigmatized identity: what influences whether students conceal or reveal their depression in undergraduate research experiences?. *International Journal of STEM Education*, 7(1), 1-18.
  - 24 Cooper, K. M., Gin, L. E., Akeeh, B., Clark, C. E., Hunter, J. S., Roderick, T. B., ... & Brownell, S. E. (2019). Factors that predict life sciences student persistence in undergraduate research experiences. *PloS one*, 14(8), e0220186.
  - 25 Cooper, K. M., Gin, L. E., Barnes, M. E., & Brownell, S. E. (2020). An exploratory study of students with depression in undergraduate research experiences. *CBE-Life Sciences Education*, 19(2), ar19.
  - 26 Corwin, L. A., Runyon, C. R., Ghanem, E., Sandy, M., Clark, G., Palmer, G. C., ... & Dolan, E. L. (2018). Effects of discovery, iteration, and collaboration in laboratory courses on undergraduates' research career intentions fully mediated by student ownership. *CBE-Life Sciences Education*, 17(2), ar20.
  - 27 Corwin, L. A., Runyon, C., Robinson, A., & Dolan, E. L. (2015). The laboratory course assessment survey: a tool to measure three dimensions of research-course design. *CBE-Life Sciences Education*, 14(4), ar37.
  - 28 D Arcy, C. E., Martinez, A., Khan, A. M., & Olimpo, J. T. (2019). Cognitive and non-cognitive outcomes associated with student engagement in a novel brain chemoarchitecture mapping course-based undergraduate research experience. *Journal of Undergraduate Neuroscience Education*, 18(1), A15.
  - 29 Dahlberg, C. L., Wiggins, B. L., Lee, S. R., Leaf, D. S., Lily, L. S., Jordt, H., & Johnson, T. J. (2019). A short, course-based research module provides metacognitive benefits in the form of more sophisticated problem solving. *Journal of College Science Teaching*, 48(4), 22-30.
  - 30 Daniels, H. A., Grineski, S. E., Collins, T. W., & Frederick, A. H. (2019). Navigating Social Relationships with Mentors and Peers: Comfort and Belonging among Men and Women in STEM Summer Research Programs. *CBE-Life Sciences Education*, 18(2), ar17.
-



- 
- 31 Daniels, H., Grineski, S. E., Collins, T. W., Morales, D. X., Morera, O., & Echegoyen, L. (2016). Factors influencing student gains from undergraduate research experiences at a Hispanic-serving institution. *CBE-Life Sciences Education*, 15(3), ar30. "
- 32 Davis, S. N., & Jones, R. M. (2017). Understanding the role of the mentor in developing research competency among undergraduate researchers. *Mentoring & Tutoring: Partnership in Learning*, 25(4), 455-465.
- 33 Davis, S. N., & Jones, R. M. (2020). The Genesis, Evolution, and Influence of Undergraduate Research Mentoring Relationships. *International Journal for the Scholarship of Teaching and Learning*, 14(1), 6.
- 34 Davis, S. N., & Wagner, S. E. (2019). Research motivations and undergraduate researchers disciplinary identity. *SAGE Open*, 9(3), 2158244019861501.
- 35 Davis, S. N., Jacobsen, S. K., & Ryan, M. (2015). Gender, race, and inequality in higher education: An intersectional analysis of faculty-student undergraduate research pairs at a diverse university. *Race, Gender & Class*, 22(3-4), 7-30.
- 36 Davis, S. N., Mahatmya, D., Garner, P. W., & Jones, R. M. (2015). Mentoring Undergraduate Scholars: A Pathway to Interdisciplinary Research?. *Mentoring & Tutoring: Partnership in Learning*, 23(5), 427-440.
- 37 Delventhal, R., & Steinhauer, J. (2020). A course-based undergraduate research experience examining neurodegeneration in *Drosophila melanogaster* teaches students to think, communicate, and perform like scientists. *PloS one*, 15(4), e0230912.
- 38 SHARP, J., MARTIN, J., & KENNEDY, M. (2014). Factors associated with student decision-making for participation in the Research Experiences for Undergraduates program.
- 39 Esparza, D., Wagler, A. E., & Olimpo, J. T. (2020). Characterization of Instructor and Student Behaviors in CURE and Non-CURE Learning Environments: Impacts on Student Motivation, Science Identity Development, and Perceptions of the Laboratory Experience. *CBE-Life Sciences Education*, 19(1), ar10.
- 40 Estrada, M., Hernandez, P. R., & Schultz, P. W. (2018). A longitudinal study of how quality mentorship and research experience integrate underrepresented minorities into STEM careers. *CBE-Life Sciences Education*, 17(1), ar9.
- 41 Flaherty, E. A., Walker, S. M., Forrester, J. H., & Ben, David, M. (2017). Effects of course, based undergraduate research experiences (CURE) on wildlife students. *Wildlife Society Bulletin*, 41(4), 701-711.
- 42 Frantz, K. J., Demetrikopoulos, M. K., Britner, S. L., Carruth, L. L., Williams, B. A., Pecore, J. L., ... & Goode, C. T. (2017). A comparison of internal dispositions and career trajectories after collaborative versus apprenticed research experiences for undergraduates. *CBE-Life Sciences Education*, 16(1), ar1.
- 43 Fromherz, S., Whitaker-Fornek, J. R., & Sharp, A. A. (2018). Classroom-Based Research Experiences to Support Underserved STEM Student Success: From Introductory Inquiry to Optogenetics in the Embryonic Chicken. *Journal of Undergraduate Neuroscience Education*, 17(1), A97.
- 44 Gehret, A. U., Trussell, J. W., & Michel, L. V. (2017). Approaching Undergraduate Research with Students Who Are Deaf and Hard-of-Hearing. *Journal of Science Education for Students with Disabilities*, 20(1), 20-35.
- 45 Ghee, M., Keels, M., Collins, D., Neal-Spence, C., & Baker, E. (2016). Fine-tuning summer research programs to promote underrepresented students persistence in the STEM pathway. *CBE-Life Sciences Education*, 15(3), ar28.
- 46 Gildehaus, L., Cotter, P., Buck, S., Sousa, M., Hueffer, K., & Reynolds, A. (2019). The Research, Advising, and Mentoring Professional: a Unique Approach to Supporting Underrepresented Students in Biomedical Research. *Innovative higher education*, 44(2), 119-131.
-

- 
- 47 Gilmore, J., Vieyra, M., Timmerman, B., Feldon, D., & Maher, M. (2015). The relationship between undergraduate research participation and subsequent research performance of early career STEM graduate students. *Journal of Higher Education*, 86(6), 834-863.
- 48 Gin, L. E., Rowland, A. A., Steinwand, B., Bruno, J., & Corwin, L. A. (2018). Students who fail to achieve predefined research goals may still experience many positive outcomes as a result of CURE participation. *CBE-Life Sciences Education*, 17(4), ar57.
- 49 Griese, E. R., McMahon, T. R., & Kenyon, D. B. (2017). A research experience for American Indian undergraduates: Utilizing an actor, partner interdependence model to examine the student, mentor dyad. *Journal of diversity in higher education*, 10(1), 39.
- 50 Grineski, S., Daniels, H., Collins, T., Morales, D. X., Frederick, A., & Garcia, M. (2018). The conundrum of social class: Disparities in publishing among STEM students in undergraduate research programs at a Hispanic majority institution. *Science education*, 102(2), 283-303.
- 51 Haeger, H., & Fresquez, C. (2016). Mentoring for inclusion: the impact of mentoring on undergraduate researchers in the sciences. *CBE-Life Sciences Education*, 15(3), ar36.
- 52 Haeger, H., BrckaLorenz, A., & Webber, K. (2015). Participation in undergraduate research at minority-serving institutions. *Perspectives on Undergraduate Research and Mentoring*, 4(1).
- 53 Hanauer, D. I., & Dolan, E. L. (2014). The project ownership survey: measuring differences in scientific inquiry experiences. *CBE-Life Sciences Education*, 13(1), 149-158.
- 54 Hanauer, D. I., & Hatfull, G. (2015). Measuring networking as an outcome variable in undergraduate research experiences. *CBE-Life Sciences Education*, 14(4), ar38.
- 55 Hanauer, D. I., Nicholes, J., Liao, F. Y., Beasley, A., & Henter, H. (2018). Short-term research experience (SRE) in the traditional lab: Qualitative and quantitative data on outcomes. *CBE-Life Sciences Education*, 17(4), ar64.
- 56 Harsh, J. A. (2016). Designing performance-based measures to assess the scientific thinking skills of chemistry undergraduate researchers. *Chemistry Education Research and Practice*, 17(4), 808-817.
- 57 Harsh, J., Esteb, J. J., & Maltese, A. V. (2017). Evaluating the development of chemistry undergraduate researchers' scientific thinking skills using performance-data: First findings from the performance assessment of undergraduate research (PURE) instrument. *Chemistry Education Research and Practice*, 18(3), 472-485.
- 58 Hernandez, P. R., Estrada, M., Woodcock, A., & Schultz, P. W. (2017). Perceptions of high mentorship quality depend on shared values more than on demographic match. *The Journal of Experimental Education*, 85(3), 450-468.
- 59 Hernandez, P. R., Hopkins, P. D., Masters, K., Holland, L., Mei, B. M., Richards-Babb, M., ... & Shook, N. J. (2018). Student integration into STEM careers and culture: A longitudinal examination of summer faculty mentors and project ownership. *CBE-Life Sciences Education*, 17(3), ar50.
- 60 Hernandez, P. R., Woodcock, A., Estrada, M., & Schultz, P. W. (2018). Undergraduate research experiences broaden diversity in the scientific workforce. *BioScience*, 68(3), 204-211.
- 61 Hirst, R. A., Bolduc, G., Liotta, L., & Packard, B. W. L. (2014). Cultivating the STEM transfer pathway and capacity for research: A partnership between a community college and a 4-year college. *Journal of College Science Teaching*, 43(4), 12-17.
- 62 Holmes, N. G., & Wieman, C. E. (2016). Examining and contrasting the cognitive activities engaged in undergraduate research experiences and lab courses. *Physical Review Physics Education Research*, 12(2), 020103.
- 63 Howes, B., & Wilson, A. M. (2015). Hidden gems: an analysis of products of undergraduate research. *Council on Undergraduate Research Quarterly*, 35(3), 38-46.
-

- 
- 64 Hsu, J. L., Wrona, A. M., Brownell, S. E., & Khalfan, W. (2016). The Explorations Program: Benefits of Single-Session, Research-Focused Classes for Students and Postdoctoral Instructors. *Journal of College Science Teaching*, 45(6), 78.
- 65 Hurst-Kennedy, J., Saum, M., Achat-Mendes, C., D Costa, A., Javazon, E., Katzman, S., ... & Barrera, A. (2020). The Impact of a Semester-Long, Cell Culture and Fluorescence Microscopy CURE on Learning and Attitudes in an Underrepresented STEM Student Population. *Journal of Microbiology & Biology Education*, 21(1).
- 66 Indorf, J. L., Weremijewicz, J., Janos, D. P., & Gaines, M. S. (2019). Adding Authenticity to Inquiry in a First-Year, Research-Based, Biology Laboratory Course. *CBE-Life Sciences Education*, 18(3), ar38.
- 67 Irby, S. M., Pelaez, N. J., & Anderson, T. R. (2019). Student Perceptions of Their Gains in Course-Based Undergraduate Research Abilities Identified as the Anticipated Learning Outcomes for a Biochemistry CURE. *Journal of Chemical Education*, 97(1), 56-65.
- 68 Jones, C. K., & Lerner, A. B. (2019). Implementing a course-based undergraduate research experience to grow the quantity and quality of undergraduate research in an animal science curriculum. *Journal of Animal Science*, 97(11), 4691-4697.
- 69 Jordan, T. C., Burnett, S. H., Carson, S., Caruso, S. M., Clase, K., DeJong, R. J., ... & Findley, A. M. (2014). A broadly implementable research course in phage discovery and genomics for first-year undergraduate students. *MBio*, 5(1).
- 70 Joshi, M., Aikens, M. L., & Dolan, E. L. (2019). Direct ties to a faculty mentor related to positive outcomes for undergraduate researchers. *BioScience*, 69(5), 389-397.
- 71 Katz, L. A., Aloisio, K. M., Horton, N. J., Ly, M., Pruss, S., Queeney, K., ... & DiBartolo, P. M. (2017). A program aimed toward inclusive excellence for underrepresented undergraduate women in the sciences. *CBE-Life Sciences Education*, 16(1), ar11.
- 72 Kinner, D., & Lord, M. (2018). Student-perceived gains in collaborative, course-based undergraduate research experiences in the Geosciences. *Journal of College Science Teaching*, 48(2), 48-58.
- 73 Kirkpatrick, C., Schuchardt, A., Baltz, D., & Cotner, S. (2019). Computer-based and bench-based undergraduate research experiences produce similar attitudinal outcomes. *CBE-Life Sciences Education*, 18(1), ar10.
- 74 Kolber, B. J., Janjic, J. M., Pollock, J. A., & Tidgewell, K. J. (2016). Summer undergraduate research: A new pipeline for pain clinical practice and research. *BMC medical education*, 16(1), 135.
- 75 Kortz, K. M., Cardace, D., & Savage, B. (2020). Affective factors during field research that influence intention to persist in the geosciences. *Journal of Geoscience Education*, 68(2), 133-151.
- 76 Lane, T. B. (2016). Research environments as counterspaces? Examining spaces that inhibit and support science identity development for Black students in STEM. *Urban Education Research & Policy Annuals*, 4(1).
- 77 Langley-Turnbaugh, S., Whitney, J., Lovewell, L., & Moeller, B. (2014). Benefits of research fellowships for undergraduates with disabilities. *Council On Undergraduate Research Quarterly*, 35(2), 39-45.
- 78 Lau, J. K., Paterniti, M., & Stefaniak, K. R. (2019). Crossing Floors: Developing an Interdisciplinary CURE between an Environmental Toxicology Course and an Analytical Chemistry Course. *Journal of Chemical Education*, 96(11), 2432-2440.
- 79 Lee, Y. M., & Burnett, D. (2019). Enhancing Undergraduate Research Experience Through a Food Science Research Project. *Journal of Food Science Education*, 18(1), 11-20.
- 80 Light, C. J., Fegley, M., & Stamp, N. (2019). Emphasizing iterative practices for a sequential course-based undergraduate research experience in microbial biofilms. *FEMS microbiology letters*, 366(23), fnaa001.
-

- 
- 81 Limeri, L. B., Asif, M. Z., Bridges, B. H., Esparza, D., Tuma, T. T., Sanders, D., ... & Dolan, E. L. (2019). , Where's my mentor?! Characterizing negative mentoring experiences in undergraduate life science research. *CBE-Life Sciences Education*, 18(4), ar61.
- 82 Lopatto, D., Rosenwald, A. G., DiAngelo, J. R., Hark, A. T., Skerritt, M., Wawersik, M., ... & Elgin, S. C. (2020). Facilitating Growth through Frustration: Using Genomics Research in a Course-Based Undergraduate Research Experience. *Journal of microbiology & biology education*, 21(1).
- 83 Mabrouk, P. A. (2015). What Knowledge of Responsible Conduct of Research Do Undergraduates Bring to Their Undergraduate Research Experiences?. *Journal of Chemical Education*, 93(1), 46-55.
- 84 Mader, C. M., Beck, C. W., Grillo, W. H., Hollowell, G. P., Hennington, B. S., Staub, N. L., ... & White, S. L. (2017). Multi-institutional, multidisciplinary study of the impact of course-based research experiences. *Journal of microbiology & biology education*, 18(2).
- 85 Malotky, M. K., Mayes, K. M., Price, K. M., Smith, G., Mann, S. N., Guinyard, M. W., ... & Young, A. J. (2020). Fostering Inclusion through an Interinstitutional, Community-Engaged, Course-Based Undergraduate Research Experience. *Journal of Microbiology & Biology Education*, 21(1).
- 86 Maltese, A., Harsh, J., & Jung, E. (2017). Evaluating undergraduate research experiences, development of a self-report tool. *Education Sciences*, 7(4), 87.
- 87 Mancha, R., & Yoder, C. Y. (2014). Factors critical to successful undergraduate research. *Council on Undergraduate Research Quarterly*, 34(4), 38-45.
- 88 McDevitt, A. L., Patel, M. V., Rose, B., & Ellison, A. M. (2016). Insights into student gains from undergraduate research using pre-and post-assessments. *BioScience*, biw141.
- 89 McIntee, F., Evans, K. R., Andreoli, J. M., Fusaro, A. J., Hwalek, M., Mathur, A., & Feig, A. L. (2018). Developing Undergraduate Scientists by Scaffolding the Entry into Mentored Research. *Scholarship and practice of undergraduate research*, 2(1), 4.
- 90 McLaughlin, J., Patel, M., Johnson, D. K., & de la Rosa, C. L. (2018). The Impact of a Short-Term Study Abroad Program That Offers a Course-Based Undergraduate Research Experience and Conservation Activities. *Frontiers: The Interdisciplinary Journal of Study Abroad*, 30(3), 100-118.
- 91 McMahan, T. R., Griese, E. R., & Kenyon, D. B. (2019). Cultivating Native American scientists: an application of an Indigenous model to an undergraduate research experience. *Cultural studies of science education*, 14(1), 77-110.
- 92 McSweeney, J. C., Hudson, T. J., Prince, L., Bene, H., Tackett, A. J., Miller Robinson, C., ... & Cornett, L. E. (2018). Impact of the INBRE summer student mentored research program on undergraduate students in Arkansas. *Advances in physiology education*, 42(1), 123-129.
- 93 Mellis, B., Soto, P., Bruce, C. D., Lacueva, G., Wilson, A. M., & Jayasekare, R. (2018). Factors affecting the number and type of student research products for chemistry and physics students at primarily undergraduate institutions: A case study. *PloS one*, 13(4), e0196338.
- 94 Moitra, K. (2017). Releasing the , GENI , : integrating authentic microbial genomics research into the classroom through GENI-ACT. *FEMS microbiology letters*, 364(21), fnx215.
- 95 Morales, D. X., Grineski, S. E., & Collins, T. W. (2019). Effects of mentoring relationship heterogeneity on student outcomes in summer undergraduate research. *Studies in Higher Education*, 1-14.
- 96 Mordacq, J. C., Drane, D. L., Swarat, S. L., & Lo, S. M. (2017). Development of course-based undergraduate research experiences using a design-based approach. *Journal of College Science Teaching*, 46(4), 64.
- 97 Morton, T. R. (2020). A phenomenological and ecological perspective on the influence of undergraduate research experiences on Black women s persistence in STEM at an HBCU. *Journal of Diversity in Higher Education*.
-

- 
- 98 Mraz-Craig, J. A., Daniel, K. L., Bucklin, C. J., Mishra, C., Ali, L., & Clase, K. L. (2018). Student Identities in Authentic Course-Based Undergraduate Research Experience. *Journal of College Science Teaching*, 48(1), 68-75.
- 99 Mutambuki, J. M., Fyneweever, H., Douglass, K., Cobern, W. W., Obare, S. O. (2019). Integrating Authentic Research Experiences into the Quantitative Analysis Chemistry Laboratory Course: STEM Majors Self-Reported Perceptions and Experiences. *Journal of Chemical Education*. 96, 8, 1591-1599.
- 100 Nadelson, L. S., Warner, D., & Brown, E. (2015). Life's lessons in the lab: A summer of learning from undergraduate research experiences. *Journal of STEM Education: Innovations and Research*, 16(3), 5-12.
- 101 Nerio, R., Webber, A., MacLachlan, E., Lopatto, D., & Caplan, A. J. (2019). One-Year Research Experience for Associate s Degree Students Impacts Graduation, STEM Retention, and Transfer Patterns. *CBE-Life Sciences Education*, 18(2), ar25.
- 102 Odera, E., Lamm, A. J., Odera, L. C., Duryea, M., & Davis, J. (2015). Understanding how research experiences foster undergraduate research skill development and influence STEM career choice. *NACTA Journal*, 59(3), 180.
- 103 Olimpo, J. T., Fisher, G. R., & DeChenne-Peters, S. E. (2016). Development and evaluation of the Tigriopus course-based undergraduate research experience: Impacts on students content knowledge, attitudes, and motivation in a majors introductory biology course. *CBE-Life Sciences Education*, 15(4), ar72.
- 104 Olimpo, J. T., Pevey, R. S., & McCabe, T. M. (2018). Incorporating an interactive statistics workshop into an introductory biology course-based undergraduate research experience (CURE) enhances students statistical reasoning and quantitative literacy skills. *Journal of microbiology & biology education*, 19(1).
- 105 Ortiz, J. L., Conkey, A. A. T., Brennan, L. A., Fedynich, L., & Green, M. (2020). Incorporating research into the undergraduate wildlife management curriculum. *Natural Sciences Education*, 49(1), e20028.
- 106 Ott, L. E., Godsay, S., Stolle-McAllister, K., Kowalewski, C., Maton, K. I., & LaCourse, W. R. (2020). Introduction to Research: A Scalable, Online Badge Implemented in Conjunction with a Classroom-Based Undergraduate Research Experience (CURE) that Promotes Students Matriculation into Mentored Undergraduate Research. *UI journal*, 11(1).
- 107 Overath, R. D., Zhang, D., & Hatherill, J. R. (2016). Implementing Course-based Research Increases Student Aspirations for STEM Degrees. *Council on Undergraduate Research Quarterly*, 37(2).
- 108 Owerbach, D., & Oyekan, A. (2015). Undergraduate research experience aids progression, graduation rates at Texas Southern University, an HBCU. *Council on Undergraduate Research Quarterly*, 36(2), 28-32.
- 109 Patel, D. I., Meling, V., Somani, A., Larrotta, D., & Byrd, D. A. (2017). Summer undergraduate nursing research experience: Implementing a mentor-based research program for minority nursing undergraduates. *Journal of Nursing Education and Practice*, 7(7), 37.
- 110 Peteroy-Kelly, M. A., Marcello, M. R., Crispo, E., Buraei, Z., Strahs, D., Isaacson, M., ... & Zuzga, D. (2017). Participation in a Year-Long CURE Embedded into Major Core Genetics and Cellular and Molecular Biology Laboratory Courses Results in Gains in Foundational Biological Concepts and Experimental Design Skills by Novice Undergraduate Researchers. *Journal of microbiology & biology education*, 18(1).
- 111 Quan, G. M., Turpen, C., & Elby, A. (2018). Interactions between disciplinary practice and joint work in undergraduate physics research experiences. *Physical Review Physics Education Research*, 14(2), 020124.
- 112 Raman, D. R., Geisinger, B. N., Kemis, M. R., & de la Mora, A. (2016). Key actions of successful summer research mentors. *Higher Education*, 72, 363-379.
-

- 
- 113 Reeves, T. D., Warner, D. M., Ludlow, L. H., & O Connor, C. M. (2018). Pathways over time: functional genomics research in an introductory laboratory course. *CBE-Life Sciences Education*, 17(1), ar1.
- 114 Robnett, R. D., Chemers, M. M., & Zurbriggen, E. L. (2015). Longitudinal associations among undergraduates' research experience, self, efficacy, and identity. *Journal of Research in Science Teaching*, 52(6), 847-867.
- 115 Robnett, R. D., Nelson, P. A., Zurbriggen, E. L., Crosby, F. J., & Chemers, M. M. (2018). Research mentoring and scientist identity: insights from undergraduates and their mentors. *International Journal of STEM Education*, 5(1), 41.
- 116 Robnett, R. D., Nelson, P. A., Zurbriggen, E. L., Crosby, F. J., & Chemers, M. M. (2019). The form and function of STEM research mentoring: A mixed-methods analysis focusing on ethnically diverse undergraduates and their mentors. *Emerging Adulthood*, 7(3), 180-193.
- 117 Rodenbusch, S. E., Hernandez, P. R., Simmons, S. L., & Dolan, E. L. (2016). Early engagement in course-based research increases graduation rates and completion of science, engineering, and mathematics degrees. *CBE-Life Sciences Education*, 15(2), ar20.
- 118 Rodrigo-Peiris, T., Xiang, L., & Cassone, V. M. (2018). A low-intensity, hybrid design between a , traditional, and a , course-based, research experience yields positive outcomes for science undergraduate freshmen and shows potential for large-scale application. *CBE-Life Sciences Education*, 17(4), ar53.
- 119 Salto, L. M., Riggs, M. L., De Leon, D. D., Casiano, C. A., & De Leon, M. (2014). Underrepresented minority high school and college students report STEM-pipeline sustaining gains after participating in the Loma Linda University Summer Health Disparities Research Program. *PloS one*, 9(9), e108497.
- 120 Sams, D., Lewis, R., McMullen, R., Bacnik, L., Hammack, J., Richards, R., & Powell, C. (2015). Measuring self-efficacy and scientific literacy across disciplines as value-added outcomes of undergraduate research mentoring: Scale development. *Council on Undergraduate Research Quarterly*, 35(3), 23-31.
- 121 Sandquist, E., Cervato, C., & Ogilvie, C. (2019). Positive Affective and Behavioral Gains of First-Year Students in Course-Based Research across Disciplines. *Scholarship and Practice of Undergraduate Research*, 2(4), 45.
- 122 Sell, A. J., Naginey, A., & Stanton, C. A. (2018). The impact of undergraduate research on academic success. *Scholarship and Practice of Undergraduate Research*, 1(3), 19-29.
- 123 Sens, D. A., Cisek, K. L., Garrett, S. H., Somji, S., Dunlevy, J. R., Sens, M. A., ... & Doze, V. A. (2017). STEERing an IDEa in undergraduate research at a rural research intensive university. *Academic pathology*, 4, 2374289517735092.
- 124 Shaffer, C. D., Alvarez, C. J., Bednarski, A. E., Dunbar, D., Goodman, A. L., Reinke, C., ... & Elgin, S. C. (2014). A course-based research experience: how benefits change with increased investment in instructional time. *CBE-Life Sciences Education*, 13(1), 111-130.
- 125 Shapiro, C., Moberg-Parker, J., Toma, S., Ayon, C., Zimmerman, H., Roth-Johnson, E. A., ... & Sanders, E. R. (2015). Comparing the impact of course-based and apprentice-based research experiences in a life science laboratory curriculum. *Journal of microbiology & biology education*, 16(2), 186.
- 126 Shreiber, D. I., Moghe, P. V., & Roth, C. M. (2015). Multidisciplinary" Boot Camp" Training in Cellular Bioengineering to Accelerate Research Immersion for REU Participants. *Advances in Engineering Education*, 4(4), n4.
- 127 Stanford, J. S., Rocheleau, S. E., Smith, K. P., & Mohan, J. (2017). Early undergraduate research experiences lead to similar learning gains for STEM and Non-STEM undergraduates. *Studies in Higher Education*, 42(1), 115-129.
- 128 Start, D., & McCauley, S. (2020). Gender underlies the formation of STEM research groups. *Ecology and Evolution*, 10(9), 3834-3843.
-

- 
- 129 Staub, N. L., Poxleitner, M., Braley, A., Smith-Flores, H., Pribbenow, C. M., Jaworski, L., ... & Anders, K. R. (2016). Scaling up: adapting a phage-hunting course to increase participation of first-year students in research. *CBE-Life Sciences Education*, 15(2), ar13.
- 130 Stephens, A. L., Pallant, A., & McIntyre, C. (2016). Telepresence-enabled remote fieldwork: Undergraduate research in the deep sea. *International Journal of Science Education*, 38(13), 2096-2113.
- 131 Sturner, K. K., Bishop, P., & Lenhart, S. M. (2017). Developing collaboration skills in team undergraduate research experiences. *Primus*, 27(3), 370-388.
- 132 Thoman, D. B., Brown, E. R., Mason, A. Z., Harmsen, A. G., & Smith, J. L. (2015). The role of altruistic values in motivating underrepresented minority students for biomedicine. *BioScience*, 65(2), 183-188.
- 133 Thoman, D. B., Muragishi, G. A., & Smith, J. L. (2017). Research microcultures as socialization contexts for underrepresented science students. *Psychological science*, 28(6), 760-773.
- 134 Thompson, J. J., Conaway, E., & Dolan, E. L. (2016). Undergraduate students' development of social, cultural, and human capital in a networked research experience. *Cultural Studies of Science Education*, 11(4), 959-990.
- 135 Tootle, T. L., Hoffmann, D. S., Allen, A. K., Spracklen, A. J., Groen, C. M., & Kelsch, D. J. (2019). Mini-course-based undergraduate research experience: Impact on student understanding of STEM research and interest in STEM programs. *Journal of College Science Teaching*, 48(6), 44-54.
- 136 Toven-Lindsey, B., Levis-Fitzgerald, M., Barber, P. H., & Hasson, T. (2015). Increasing persistence in undergraduate science majors: A model for institutional support of underrepresented students. *CBE-Life Sciences Education*, 14(2), ar12.
- 137 Trott, C. D., Sample McMeeking, L. B., Bowker, C. L., & Boyd, K. J. (2020). Exploring the long-term academic and career impacts of undergraduate research in geoscience: A case study. *Journal of Geoscience Education*, 68(1), 65-79.
- 138 Trott, C. D., Weinberg, A. E., & Sample McMeeking, L. B. (2018). Prefiguring sustainability through participatory action research experiences for undergraduates: Reflections and recommendations for student development. *Sustainability*, 10(9), 3332.
- 139 Vincent-Ruz, P., Grabowski, J., & Schunn, C. D. (2018). The Impact of Early Participation in Undergraduate Research Experiences on Multiple Measures of Premed Path Success. *Scholarship and Practice of Undergraduate Research*, 1(3), 13-18.
- 140 Vora, N. J., Vatcheva, K., Saldivar, M. G., Nair, S., Lehker, M. W., & Chew, S. A. (2020). Biomedical Freshman Research Initiative: A Course-based Undergraduate Research Experience at a Hispanic-Serving Institution. *Journal of Latinos and Education*, 1-14.
- 141 Weston, T. J., & Laursen, S. L. (2015). The undergraduate research student self-assessment (URSSA): Validation for use in program evaluation. *CBE-Life Sciences Education*, 14(3), ar33.
- 142 Wiley, E. A., & Stover, N. A. (2014). Immediate dissemination of student discoveries to a model organism database enhances classroom-based research experiences. *CBE-Life Sciences Education*, 13(1), 131-138.
- 143 Williams, L. C., Reddish, M. J. (2018). Integrating Primary Research into the Teaching Lab: Benefits and Impacts of a One-Semester CURE for Physical Chemistry. *Journal of Chemical Education*, 95, 6, 928-938.
- 144 Wilson, A. E., Pollock, J. L., Billick, I., Domingo, C., Fernandez-Figueroa, E. G., Nagy, E. S., ... & Summers, A. (2018). Assessing science training programs: Structured undergraduate research programs make a difference. *BioScience*, 68(7), 529-534.
- 145 Wolkow, T. D., Durrenberger, L. T., Maynard, M. A., Harrall, K. K., & Hines, L. M. (2014). A comprehensive faculty, staff, and student training program enhances student perceptions
-

- 
- of a course-based research experience at a two-year institution. *CBE-Life Sciences Education*, 13(4), 724-737.
- 146 Wolkow, T. D., Jenkins, J., Durrenberger, L., Swanson-Hoyle, K., & Hines, L. M. (2019). One Early Course-Based Undergraduate Research Experience Produces Sustainable Knowledge Gains, but only Transient Perception Gains. *Journal of microbiology & biology education*, 20(2).
- 147 Yaffe, K., Bender, C., & Sechrest, L. (2014). How does undergraduate research experience impact career trajectories and level of career satisfaction: A comparative survey. *Journal of College Science Teaching*, 44(1), 25-33.
-



### S5. Studies by discipline and research type

| <b>Discipline</b> | <b>Total Research Papers (n=147)<br/>% (n)</b> | <b>Papers on Independent UREs (n=90)<br/>%(n)</b> | <b>Papers on CUREs (n=53)<br/>% (n)</b> | <b>Papers on both Independent UREs and CUREs (n=4)<br/>% (n)</b> |
|-------------------|------------------------------------------------|---------------------------------------------------|-----------------------------------------|------------------------------------------------------------------|
| Biochemistry      | 0 (1)                                          | 0 (0)                                             | 2 (1)                                   | 0 (0)                                                            |
| Biology           | 46 (67)                                        | 28 (25)                                           | 74 (39)                                 | 75 (3)                                                           |
| Chemistry         | 5 (8)                                          | 4 (4)                                             | 8 (4)                                   | 0 (0)                                                            |
| Geosciences       | 3 (4)                                          | 3 (3)                                             | 2 (1)                                   | 0 (0)                                                            |
| Health sciences   | 2 (3)                                          | 3 (3)                                             | 0 (0)                                   | 0 (0)                                                            |
| Physics           | 1 (2)                                          | 2 (2)                                             | 0 (0)                                   | 0 (0)                                                            |
| STEM              | 32 (47)                                        | 42 (38)                                           | 15 (8)                                  | 25 (1)                                                           |
| STEM + non-STEM   | 10 (15)                                        | 17 (15)                                           | 0 (0)                                   | 0 (0)                                                            |

**S6. Specific demographics reported and considered in analysis across all research papers**

| <b>Demographic Variable</b>           | <b>Reported<br/>(n = 147)<br/>% (n)</b> | <b>Considered in Analysis<br/>(n = 147)<br/>% (n)</b> |
|---------------------------------------|-----------------------------------------|-------------------------------------------------------|
| Gender                                | 79.59 (117)                             | 43.54 (64)                                            |
| Race/ethnicity                        | 69.38 (102)                             | 41.50 (61)                                            |
| Major                                 | 42.86 (63)                              | 17.69 (26)                                            |
| Grade-point-average<br>(GPA)          | 17.69 (26)                              | 14.29 (21)                                            |
| Generation status                     | 28.57 (42)                              | 14.29 (21)                                            |
| Prior research experience             | 18.37 (27)                              | 12.92 (19)                                            |
| Class level (year in<br>school)       | 44.22 (65)                              | 11.56 (17)                                            |
| Career goals                          | 14.29 (21)                              | 8.84 (13)                                             |
| Standardized testing<br>scores        | 6.80 (10)                               | 6.12 (9)                                              |
| Age                                   | 19.73 (29)                              | 6.12 (9)                                              |
| Socioeconomic status                  | 12.24 (18)                              | 5.44 (8)                                              |
| Number of credits earned              | 2.72 (4)                                | 2.72 (4)                                              |
| Mental health status                  | 2.04 (3)                                | 2.04 (3)                                              |
| Honor's student                       | 2.04 (3)                                | 2.04 (3)                                              |
| Employment status                     | 2.72 (4)                                | 2.04 (3)                                              |
| Disability status                     | 4.08 (6)                                | 2.04 (3)                                              |
| Community college<br>transfer student | 2.04 (3)                                | 1.36 (2)                                              |

| <b>Demographic Variable</b>  | <b>Reported<br/>(n = 147)<br/>% (n)</b> | <b>Considered in Analysis<br/>(n = 147)<br/>% (n)</b> |
|------------------------------|-----------------------------------------|-------------------------------------------------------|
| English as second language   | 3.40 (5)                                | 1.36 (2)                                              |
| Commuter status              | 2.72 (4)                                | 1.36 (2)                                              |
| Caregiving status            | 1.36 (2)                                | 1.36 (2)                                              |
| State residency status       | 0.68 (1)                                | 0.68 (1)                                              |
| Religious identity           | 0.00 (0)                                | 0.00 (0)                                              |
| Military status              | 0.00 (0)                                | 0.00 (0)                                              |
| LGBTQ+ status                | 0.00 (0)                                | 0.00 (0)                                              |
| International student status | 0.00 (0)                                | 0.00 (0)                                              |
| No demographics included     | 12.25 (18)                              | 38.10 (56)                                            |

### S7. Specific demographics reported and considered in analyses by URE type

| Demographic Variable        | Reported<br>n (%)            |                  | Considered in Analysis<br>n (%) |                  |
|-----------------------------|------------------------------|------------------|---------------------------------|------------------|
|                             | Independent URE*<br>(n = 94) | CURE<br>(n = 57) | Independent URE<br>(n = 94)     | CURE<br>(n = 57) |
| Gender                      | 82.98 (78)                   | 73.68 (42)       | 53.19 (50)                      | 28.07 (16)       |
| Race/ethnicity              | 72.34 (68)                   | 64.91 (37)       | 51.06 (48)                      | 26.32 (15)       |
| Major                       | 40.42 (38)                   | 43.86 (25)       | 20.21 (19)                      | 12.28 (7)        |
| Grade-point-average (GPA)   | 21.28 (20)                   | 10.53 (6)        | 15.96 (15)                      | 12.28 (7)        |
| College generation status   | 29.79 (28)                   | 24.56 (14)       | 15.96 (15)                      | 10.53 (6)        |
| Prior research experience   | 22.34 (21)                   | 10.53 (6)        | 15.96 (15)                      | 7.02 (4)         |
| Class level                 | 43.62 (41)                   | 45.61 (26)       | 13.83 (13)                      | 8.77 (5)         |
| Career goals                | 14.89 (14)                   | 12.28 (7)        | 10.64 (10)                      | 5.26 (3)         |
| Standardized testing scores | 6.38 (6)                     | 7.02 (4)         | 5.32 (5)                        | 7.02 (4)         |
| Age                         | 24.47 (23)                   | 10.53 (6)        | 7.45 (7)                        | 3.51 (2)         |
| Socioeconomic status        | 12.77 (12)                   | 14.03 (8)        | 7.45 (7)                        | 3.51 (2)         |
| Number of credits earned    | 3.19 (3)                     | 1.75 (1)         | 3.19 (3)                        | 1.75 (1)         |
| Mental health status        | 3.19 (3)                     | 0.00 (0)         | 3.19 (3)                        | 0.00 (0)         |
| Honor's status              | 3.19 (3)                     | 0.00 (0)         | 3.19 (3)                        | 0.00 (0)         |
| Employment status           | 3.19 (3)                     | 1.75 (1)         | 3.19 (3)                        | 0.00 (0)         |
| Disability status           | 5.32 (5)                     | 3.51 (2)         | 3.19 (3)                        | 0.00 (0)         |
| Community college           | 3.19 (3)                     | 1.75 (1)         | 2.13 (2)                        | 1.75 (1)         |

| <b>Demographic Variable</b>  | <b>Reported<br/>n (%)</b>                |                          | <b>Considered in Analysis<br/>n (%)</b> |                          |
|------------------------------|------------------------------------------|--------------------------|-----------------------------------------|--------------------------|
|                              | <b>Independent<br/>URE*<br/>(n = 94)</b> | <b>CURE<br/>(n = 57)</b> | <b>Independent<br/>URE<br/>(n = 94)</b> | <b>CURE<br/>(n = 57)</b> |
| transfer student             |                                          |                          |                                         |                          |
| English as a second language | 4.25 (4)                                 | 1.75 (1)                 | 2.13 (2)                                | 0.00 (0)                 |
| Commuter status              | 2.13 (2)                                 | 3.51 (2)                 | 2.13 (2)                                | 0.00 (0)                 |
| Caregiving status            | 2.13 (2)                                 | 0.00 (0)                 | 2.13 (2)                                | 0.00 (0)                 |
| State residency status       | 0.00 (0)                                 | 1.75 (1)                 | 0.00 (0)                                | 1.75 (1)                 |
| Religious identity           | 0.00 (0)                                 | 0.00 (0)                 | 0.00 (0)                                | 0.00 (0)                 |
| Military status              | 0.00 (0)                                 | 0.00 (0)                 | 0.00 (0)                                | 0.00 (0)                 |
| LGBTQ+ status                | 0.00 (0)                                 | 0.00 (0)                 | 0.00 (0)                                | 0.00 (0)                 |
| International student status | 0.00 (0)                                 | 0.00 (0)                 | 0.00 (0)                                | 0.00 (0)                 |
| No demographics included     | 9.57 (9)                                 | 17.54 (10)               | 29.79 (28)                              | 52.63 (30)               |

\* Four papers which contained data on multiple types of research experiences are included in both the “Independent UREs” and “CUREs” columns.

**S8. Analyses of demographic variable use by study research type**

|                                                       | <b>All Studies<br/>(n=147)</b> | <b>Independent<br/>UREs<br/>(n=90)</b> | <b>CURES<br/>(n=53)</b> | <b>Statistical Test</b>                      |
|-------------------------------------------------------|--------------------------------|----------------------------------------|-------------------------|----------------------------------------------|
| <b>Studies with ≥1 Demographic Variable</b>           |                                |                                        |                         |                                              |
|                                                       | % (n)                          | % (n)                                  | % (n)                   | <b><math>\chi^2</math> test <sup>a</sup></b> |
| <i>Reported</i>                                       | 88 (129)                       | 91 (82)                                | 83 (44)                 | $\chi^2(1) = 1.38, p = 0.24$                 |
| <i>Considered<br/>in analyses</i>                     | 62 (91)                        | 71 (64)                                | 47 (25)                 | $\chi^2(1) = 7.15, p < 0.01$                 |
| <b>Average Number of Unique Demographic Variables</b> |                                |                                        |                         |                                              |
|                                                       | Mean (SD)                      | Mean (SD)                              | Mean (SD)               | <b>Welch's <i>t</i>-test <sup>b</sup></b>    |
| <i>Reported</i>                                       | 4.1(2.6)                       | 4.46 (2.6)                             | 3.55 (2.3)              | $t = -2.13, df = 121.04,$<br>$p < 0.05$      |
| <i>Considered<br/>in analyses</i>                     | 2.1 (2.5)                      | 2.64 (2.7)                             | 1.28 (1.9)              | $t = -3.56, df = 135.32,$<br>$p < 0.001$     |

Four papers that considered both independent UREs and CURES are omitted from these analyses. <sup>a</sup> Pearson's chi-square test for independence evaluated differences in the proportion of independent UREs or CURES that reported or considered at least one demographic variable in analyses. <sup>b</sup> Welch's *t*-tests evaluated differences in the average numbers of different demographic variables reported or considered in analysis by research type.

### S9. Specific demographics reported and considered in analyses by methodological type

| Demographic Variable            | Represented<br>% (n) |                  |                   | Considered in Analysis<br>% (n) |                  |                   |
|---------------------------------|----------------------|------------------|-------------------|---------------------------------|------------------|-------------------|
|                                 | Quant<br>(n = 80)    | Qual<br>(n = 17) | Mixed<br>(n = 50) | Quant<br>(n = 80)               | Qual<br>(n = 17) | Mixed<br>(n = 50) |
| Gender                          | 80 (64)              | 76.47 (13)       | 80 (40)           | 51.25 (41)                      | 41.18 (7)        | 32 (16)           |
| Race/<br>ethnicity              | 71.25 (57)           | 70.59 (12)       | 66 (33)           | 48.75 (39)                      | 47.06 (8)        | 28 (14)           |
| Major                           | 43.75 (35)           | 41.18 (7)        | 42 (21)           | 23.75 (19)                      | 0 (0)            | 14 (7)            |
| Grade-point-<br>average (GPA)   | 18.75 (15)           | 0 (0)            | 22 (11)           | 18.75 (15)                      | 0 (0)            | 12 (6)            |
| College<br>generation<br>status | 30 (24)              | 11.76 (2)        | 32 (16)           | 18.75 (15)                      | 0 (0)            | 12 (6)            |
| Prior research<br>experience    | 22.5 (18)            | 23.53 (4)        | 10 (5)            | 18.75 (15)                      | 5.88 (1)         | 6 (3)             |
| Class level                     | 41.25 (33)           | 47.06 (8)        | 48 (24)           | 17.5 (14)                       | 0 (0)            | 6 (3)             |
| Career goals                    | 13.75 (11)           | 17.65 (3)        | 14 (7)            | 8.75 (7)                        | 29.41 (5)        | 2 (1)             |
| Standardized<br>testing scores  | 8.75 (7)             | 0 (0)            | 6 (3)             | 8.75 (7)                        | 0 (0)            | 4 (2)             |
| Age                             | 20 (16)              | 11.76 (2)        | 22 (11)           | 8.75 (7)                        | 0 (0)            | 4 (2)             |
| Socioeconomic<br>status         | 10 (8)               | 11.76 (2)        | 16 (8)            | 7.5 (6)                         | 0 (0)            | 4 (2)             |
| Number of<br>credits earned     | 2.5 (2)              | 0 (0)            | 4 (2)             | 2.5 (2)                         | 0 (0)            | 4 (2)             |
| Mental health<br>status         | 0 (0)                | 0 (0)            | 6 (3)             | 0 (0)                           | 0 (0)            | 6 (3)             |
| Honor's status                  | 3.75 (3)             | 0 (0)            | 0 (0)             | 3.75 (3)                        | 0 (0)            | 0 (0)             |
| Employment<br>status            | 3.75 (3)             | 5.88 (1)         | 0 (0)             | 2.5 (2)                         | 0 (0)            | 2 (1)             |

| Demographic Variable               | Represented<br>% (n) |                  |                   | Considered in Analysis<br>% (n) |                  |                   |
|------------------------------------|----------------------|------------------|-------------------|---------------------------------|------------------|-------------------|
|                                    | Quant<br>(n = 80)    | Qual<br>(n = 17) | Mixed<br>(n = 50) | Quant<br>(n = 80)               | Qual<br>(n = 17) | Mixed<br>(n = 50) |
| Disability status                  | 6.25 (5)             | 0 (0)            | 2 (1)             | 2.5 (2)                         | 0 (0)            | 2 (1)             |
| Community college transfer student | 0 (0)                | 0 (0)            | 6 (3)             | 1.25 (1)                        | 0 (0)            | 2 (1)             |
| English as a second language       | 5 (4)                | 0 (0)            | 2 (1)             | 1.25 (1)                        | 0 (0)            | 2 (1)             |
| Commuter status                    | 2.5 (2)              | 0 (0)            | 4 (2)             | 2.5 (2)                         | 0 (0)            | 0 (0)             |
| Caregiving status                  | 2.5 (2)              | 0 (0)            | 0 (0)             | 2.5 (2)                         | 0 (0)            | 0 (0)             |
| State residency status             | 0 (0)                | 0 (0)            | 2 (1)             | 0 (0)                           | 0 (0)            | 2 (1)             |
| Religious identity                 | 0 (0)                | 0 (0)            | 0 (0)             | 0 (0)                           | 0 (0)            | 0 (0)             |
| Military status                    | 0 (0)                | 0 (0)            | 0 (0)             | 0 (0)                           | 0 (0)            | 0 (0)             |
| LGBTQ+ status                      | 0 (0)                | 0 (0)            | 0 (0)             | 0 (0)                           | 0 (0)            | 0 (0)             |
| International student status       | 0 (0)                | 0 (0)            | 0 (0)             | 0 (0)                           | 0 (0)            | 0 (0)             |
| No demographics included           | 11.25 (9)            | 11.76 (2)        | 14 (7)            | 30 (24)                         | 35.29 (6)        | 52 (26)           |



**S10. Analyses of demographic variable use by study method type**

|                                                       | <b>All Studies<br/>(n=147)</b> | <b>Quantitative<br/>(n=80)</b> | <b>Mixed<br/>Methods<br/>(n=50)</b> | <b>Qualitative<br/>(n=17)</b> | <b>Statistical Test</b>                |
|-------------------------------------------------------|--------------------------------|--------------------------------|-------------------------------------|-------------------------------|----------------------------------------|
| <b>Studies with ≥1 Demographic Variable</b>           |                                |                                |                                     |                               |                                        |
|                                                       | % (n)                          | % (n)                          | % (n)                               | % (n)                         | <b>χ<sup>2</sup> test <sup>a</sup></b> |
| <i>Reported</i>                                       | 88 (129)                       | 89 (71)                        | 86 (43)                             | 88 (15)                       | χ <sup>2</sup> (2) = 0.22, p = 0.90    |
| <i>Considered<br/>in analyses</i>                     | 62 (91)                        | 70 (56)                        | 48 (24)                             | 65 (11)                       | χ <sup>2</sup> (2) = 6.38, p = 0.04    |
| <b>Average Number of Unique Demographic Variables</b> |                                |                                |                                     |                               |                                        |
|                                                       | Mean (SD)                      | Mean (SD)                      | Mean (SD)                           | Mean (SD)                     | <b>ANOVA<sup>b</sup></b>               |
| <i>Reported</i>                                       | 4.1(2.6)                       | 4.2 (2.7)                      | 4.1 (2.5)                           | 3.4 (2.1)                     | F (2, 144) = 0.834, p = 0.44           |
| <i>Considered<br/>in analyses</i>                     | 2.1 (2.5)                      | 2.7 (2.8)                      | 1.5 (2.1)                           | 1.3 (1.3)                     | F (2, 144) = 5.04, p < 0.01            |

<sup>a</sup> Pearson's chi-square test for independence evaluated differences in the proportion of quantitative, mixed methods, and qualitative studies that reported or considered at least one demographic variable in analyses. <sup>b</sup> ANOVA evaluated differences in the average numbers of different demographic variables reported or considered in analysis by study type.

## S11. Full linear and logistic regression results

We used linear and logistic regression models to explore patterns in how studies on undergraduate research experiences reported and considered demographic variables over time.

### 1. Logistic regression to test if the likelihood of studies reporting one or more demographic variables changed between 2014 and 2020

Model: Reporting at least one demographic variable ~ year

|                    | <b>Estimate</b> | <b>Std. Error</b> | <b>z-value</b> | <b>p-value</b> |
|--------------------|-----------------|-------------------|----------------|----------------|
| <b>(Intercept)</b> | -81.28804       | 271.79129         | -0.299         | 0.765          |
| <b>Year</b>        | 00.04127        | 0.13474           | 0.306          | 0.759          |

### 2. Logistic regression to test if the likelihood of studies considering one or more demographic variables in analyses changed between 2014 and 2020

Model: Considering at least one demographic variable in analysis ~ year

|                    | <b>Estimate</b> | <b>Std. Error</b> | <b>z-value</b> | <b>p-value</b> |
|--------------------|-----------------|-------------------|----------------|----------------|
| <b>(Intercept)</b> | -225.10810      | 185.24081         | -1.215         | 0.224          |
| <b>Year</b>        | 0.11183         | 0.09183           | 1.218          | 0.223          |

### 3. Linear Regression to test if the average number of demographic variables reported changed between 2014 and 2020

Model: # of demographic variables reported ~ year

|                    | <b>Estimate</b> | <b>Std. Error</b> | <b>t-value</b> | <b>p-value</b> |
|--------------------|-----------------|-------------------|----------------|----------------|
| <b>(Intercept)</b> | -182.01132      | 230.00256         | -0.791         | 0.43           |
| <b>Year</b>        | 0.09226         | 0.11402           | 0.809          | 0.42           |

F-statistic: 0.6547 on 1 and 145 DF, p-value: 0.4198

### 4. Linear Regression to test if the average number of demographic variables considered in analyses changed between 2014 and 2020

Model: # of demographic variables considered in analyses ~ year

|                    | <b>Estimate</b> | <b>Std. Error</b> | <b>t-value</b> | <b>p-value</b> |
|--------------------|-----------------|-------------------|----------------|----------------|
| <b>(Intercept)</b> | 1.542e+00       | 2.228e+02         | 0.007          | 0.994          |
| <b>Year</b>        | 2.944e-04       | 1.104e-01         | 0.003          | 0.998          |

F-statistic: 7.103e-06 on 1 and 145 DF, p-value: 0.998
